# Supplementary material for: Digitized endocasts and brains: a perspective on measurements and historical analyses of the evolution of 172 fossil and extant amniote specimens
Source: PeerJ. 2025 Sep 16;13:e19826. doi: 10.7717/peerj.19826 (PMC12447954; doi:10.7717/peerj.19826)
Supplement: Supplemental Information 3 — Datasets are listed by taxon, museum name, accession number and MorphoSource DOI. [file peerj-13-19826-s003.xlsx]

## Sheet: DOIs
Collection	Scientific Name	Catalog Number	MorphoSource DOI	Collection Staff Acknowledgement
Field Museum of Natural History - Vertebrate Paleontology	Adapis parisiensis (Leptadapis magnus)	FMNH PM 59259	https://doi.org/10.17602/M2/M447858
Field Museum of Natural History - Vertebrate Paleontology	Adinotherium ovinum	FMNH P 12986	https://doi.org/10.17602/M2/M399504
Natural History Museum of Los Angeles - La Brea Tar Pits	Aenocyon dirus	LACMHC 2300-82	https://doi.org/10.17602/M2/M384303
Yale Peabody Museum of Natural History - Vertebrate Paleontology	Amynodon (Diceratherium) advenus	YPM VP 11453	https://doi.org/10.17602/M2/M392380
Natural History Museum, London - Vertebrate Paleontology	Anoplotherium commune	NHMUK PV M 3753	https://doi.org/10.17602/M2/M410803
Field Museum of Natural History - Vertebrate Paleontology	Apterodon macrognathus	FMNH PM 57147	https://doi.org/10.17602/M2/M518818
American Museum of Natural History - Vertebrate Paleontology	Archaeolemur majori	AMNH FM 30007	https://doi.org/10.17602/M2/M395514
Yale Peabody Museum of Natural History - Vertebrate Paleontology	Archaeotherium mortoni	YPM VPPU 10908	https://doi.org/10.17602/M2/M392360
Muséum national d'Histoire naturelle - Vertebrate Paleontology	Arctocyon primaevus	MNHN F CR700	https://doi.org/10.17602/M2/M411215
Field Museum of Natural History - Vertebrate Paleontology	Arctodus simus	FMNH PM 59022	https://doi.org/10.17602/M2/M411151
Smithsonian National Museum of Natural History - Paleobiology	Argyrocetus joaquinensis	USNM 11996	https://doi.org/10.17602/M2/M451506
Natural History Museum, London - Vertebrate Paleontology	Arsinotherium zitelli	NHMUK PV M 8539	https://doi.org/10.17602/M2/M387629
Smithsonian National Museum of Natural History - Paleobiology	Aulophyseter morricei	USNM 11230	https://doi.org/10.17602/M2/M451512
University of Witswatersrand	Australopithecus africanus	Taung 1	https://doi.org/10.17602/M2/M447913
Texas Vertebrate Paleontology Collections	Bathygenys reevesi	TMM TXVP 40209-431	https://doi.org/10.17602/M2/M387591
Field Museum of Natural History - Vertebrate Paleontology	Borhyaena tuberata	FMNH P 13266	https://doi.org/10.17602/M2/M399509
National Museum of Health and Medicine - University of Wisconsin Neuroanatomy Collection	Canis latrans	NMHM Vertebrates WISC 62-301	https://doi.org/10.17602/M2/M454741
Natural History Museum of Los Angeles - La Brea Tar Pits	Canis latrans	LACMHC 3200-7	https://doi.org/10.17602/M2/M384308
American Museum of Natural History - Vertebrate Paleontology	Carpocyon webbi	AMNH FM 61328	https://doi.org/10.17602/M2/M395522
Field Museum of Natural History - Vertebrate Paleontology	Cebochoerus lacustris	FMNH PM 59051	https://doi.org/10.17602/M2/M399515
American Museum of Natural History - Mammals	Cercocebus (Lophocebus) albigena	AMNH Mammals 52583	https://doi.org/10.17602/M2/M387760
American Museum of Natural History - Mammals	Cercopithecus monachus	AMNH Mammals 75981	https://doi.org/10.17602/M2/M387802
Field Museum of Natural History - Mammals	Cerdocyon thous	FMNH Mammals 146294	https://doi.org/10.17602/M2/M397641
American Museum of Natural History - Vertebrate Paleontology	Chadronia margaretae	AMNH FM 109412	https://doi.org/10.17602/M2/M395529
American Museum of Natural History - Vertebrate Paleontology	Cormohipparion occidentale	AMNH FM 71866	https://doi.org/10.17602/M2/M395535
Yale Peabody Museum of Natural History - Vertebrate Paleontology	Coryphodon hamatus	YPM VP 11331	https://doi.org/10.17602/M2/M392375
Field Museum of Natural History - Vertebrate Paleontology	Cynodictis (Stenoplesictis) cayluxi	FMNH PM 59013	https://doi.org/10.17602/M2/M399521
Field Museum of Natural History - Vertebrate Paleontology	Cynohyaenodon cayluxi	FMNH PM 57153	https://doi.org/10.17602/M2/M399527
Field Museum of Natural History - Vertebrate Paleontology	Daphoenus vetus	FMNH PM UM1	https://doi.org/10.17602/M2/M399532
Yale Peabody Museum of Natural History - Vertebrate Paleontology	Daphoenus vetus	YPM VPPU 12588	https://doi.org/10.17602/M2/M392369
Carnegie Museum of Natural History - Vertebrate Paleontology	Desmathyus (Thinohyus sp.)	CM VP 1423	https://doi.org/10.17602/M2/M411033
Natural History Museum, London - Vertebrate Paleontology	Dorudon atrox	NHMUK PV M 10173 b	https://doi.org/10.17602/M2/M387673
Field Museum of Natural History - Vertebrate Paleontology	Enaliarctos sp.	FMNH PM 57161	https://doi.org/10.17602/M2/M399538
American Museum of Natural History - Vertebrate Paleontology	Eomoropus amarorum	AMNH FM 5096	https://doi.org/10.17602/M2/M395541
Yale Peabody Museum of Natural History - Vertebrate Paleontology	Eporeodon socialis (Eporeodon jacksoni, Merycoidodon bullatus)	YPM VP 13118	https://doi.org/10.17602/M2/M392488
Harry Jerison	Equus caballus	L-HJ Vertebrates 0006	https://doi.org/10.17602/M2/M397276
Harry Jerison	Equus caballus	L-HJ Vertebrates 0005	https://doi.org/10.17602/M2/M397271
Natural History Museum of Los Angeles - La Brea Tar Pits	Equus occidentalis	LACMHC 3500-17	https://doi.org/10.17602/M2/M384314
Natural History Museum of Los Angeles - Mammals	Equus sp.	LACM Mammals 342	https://doi.org/10.17602/M2/M384293
American Museum of Natural History - Mammals	Erythrocebus patas	AMNH Mammals 52574	https://doi.org/10.17602/M2/M387778
Field Museum of Natural History - Vertebrate Paleontology	Eusmilus bidentatus	FMNH PM 58871	https://doi.org/10.17602/M2/M411221
Field Museum of Natural History - Mammals	Felis catus (Felis silvestris lybica)	FMNH Mammals 146456	https://doi.org/10.17602/M2/M397646
Senckenberg Gesellschaft für Naturforschung - Paleontology	Halitherium schinzi	SMF M 3921	https://doi.org/10.17602/M2/M397601
Harry Jerison	Hapalops sp.	L-HJ Vertebrates 0002	https://doi.org/10.17602/M2/M411120
American Museum of Natural History - Vertebrate Paleontology	Hemicyon cf. barbouri	AMNH FM 25530	https://doi.org/10.17602/M2/M395547
Field Museum of Natural History - Vertebrate Paleontology	Heptodon sp.	FMNH PM 59193	https://doi.org/10.17602/M2/M399544
Field Museum of Natural History - Vertebrate Paleontology	Hesperocyon gregarius	FMNH PM 58989	https://doi.org/10.17602/M2/M399550
Field Museum of Natural History - Vertebrate Paleontology	Homalodotherium cunninghami	FMNH PM 59291	https://doi.org/10.17602/M2/M399556
Dean Falk	Homo sapiens	Falk A	https://doi.org/10.17602/M2/M396829
Dean Falk	Homo sapiens	Falk B	https://doi.org/10.17602/M2/M396844
American Museum of Natural History - Vertebrate Paleontology	Homotherium sp.	AMNH FM 95297	https://doi.org/10.17602/M2/M395583
Smithsonian National Museum of Natural History - Paleobiology	Hoplophoneus primaevus	USNM Paleobiology V 22538	https://doi.org/10.17602/M2/M518797
Dean Falk	Hylobates lar	Falk 386	https://doi.org/10.17602/M2/M396885
Carnegie Museum of Natural History - Vertebrate Paleontology	Hylomeryx simplicidens (Hylomeryx quadricuspis)	CM VP 2915	https://doi.org/10.17602/M2/M411093
Yale Peabody Museum of Natural History - Vertebrate Paleontology	Hyrachyus modestus	YPM VPPU 10145	https://doi.org/10.17602/M2/M392350
Yale Peabody Museum of Natural History - Vertebrate Paleontology	Hyrachyus modestus	YPM VP 11082	https://doi.org/10.17602/M2/M392424
American Museum of Natural History - Vertebrate Paleontology	Hyracotherium	AMNH FM 55268	https://doi.org/10.17602/M2/M395589
American Museum of Natural History - Vertebrate Paleontology	Isectolophus latidens	AMNH FM 12222	https://doi.org/10.17602/M2/M395595
National Museum of Health and Medicine - University of Wisconsin Neuroanatomy Collection	Lama glama	NMHM Vertebrates WISC 65-139	https://doi.org/10.17602/M2/M454746
Field Museum of Natural History - Vertebrate Paleontology	Leontinia gaudryi	FMNH P 13285	https://doi.org/10.17602/M2/M399562
American Museum of Natural History - Vertebrate Paleontology	Leptauchenia decora	AMNH FM 627	https://doi.org/10.17602/M2/M395601
Harry Jerison	Leptictis (Ictops acutidens)	L-HJ Vertebrates 0004	https://doi.org/10.17602/M2/M397585
Field Museum of Natural History - Vertebrate Paleontology	Leptocyon sp	FMNH PM 58961	https://doi.org/10.17602/M2/M518824
Field Museum of Natural History - Vertebrate Paleontology	Leptolambda (Barylambda) schmidti	FMNH P 26075	https://doi.org/10.17602/M2/M399573
Field Museum of Natural History - Vertebrate Paleontology	Leptolambda sp (Barylambda schmidti)	FMNH P 15573	https://doi.org/10.17602/M2/M405069
Field Museum of Natural History - Mammals	Lontra canadensis	FMNH Mammals 146394	https://doi.org/10.17602/M2/M397651
Jack Johnson	Macropus fuliginosus	MSU 64023	https://doi.org/10.17602/M2/M397595
American Museum of Natural History - Mammals	Mandrillus sphinx	AMNH Mammals 274	https://doi.org/10.17602/M2/M387786
Harry Jerison	Megalonyx jeffersoni	L-HJ Vertebrates 0001	https://doi.org/10.17602/M2/M411135
Smithsonian National Museum of Natural History - Paleobiology	Meniscotherium robustum	USNM Paleobiology V 19509	https://doi.org/10.17602/M2/M518802
Field Museum of Natural History - Vertebrate Paleontology	Menodus ingens (Megacerops coloradensis)	FMNH PM 59199	https://doi.org/10.17602/M2/M405088
American Museum of Natural History - Vertebrate Paleontology	Merychippus (Atavahippus) isonesus	AMNH FM 71150	https://doi.org/10.17602/M2/M395607
Natural History Museum of Los Angeles - Vertebrate Paleontology	Merychippus seversus	LACM (CIT) 2929	https://doi.org/10.17602/M2/M392627
American Museum of Natural History - Vertebrate Paleontology	Merycochoerus proprius	AMNH FM 43016 A	https://doi.org/10.17602/M2/M395613
Field Museum of Natural History - Vertebrate Paleontology	Merycocoidodon culbertsoni	FMNH PM UM3	https://doi.org/10.17602/M2/M405104
Yale Peabody Museum of Natural History - Vertebrate Paleontology	Mesatirhinus (Eobasileus) junius	YPM VPPU 10041	https://doi.org/10.17602/M2/M392478
American Museum of Natural History - Vertebrate Paleontology	Mesatirhinus petersoni	AMNH FM 1509	https://doi.org/10.17602/M2/M396078
American Museum of Natural History - Vertebrate Paleontology	Mesocyon coryphaeus	AMNH FM 6946	https://doi.org/10.17602/M2/M396084
American Museum of Natural History - Vertebrate Paleontology	Mesohippus bairdi	AMNH FM 9814	https://doi.org/10.17602/M2/M396090
Yale Peabody Museum of Natural History - Vertebrate Paleontology	Mesonyx obtusidens	YPM VP 13141	https://doi.org/10.17602/M2/M392404
Field Museum of Natural History - Vertebrate Paleontology	Mixtotherium cuspulatum	FMNH PM 59052	https://doi.org/10.17602/M2/M405131
Natural History Museum, London - Vertebrate Paleontology	Moeritherium lyonsi	NHMUK PV M 9176 b	https://doi.org/10.17602/M2/M387741
Field Museum of Natural History - Vertebrate Paleontology	Mustelictes piveteaui	FMNH PM 58907	https://doi.org/10.17602/M2/M518830
Natural History Museum of Los Angeles - Vertebrate Paleontology	Mylodon	LACM VP 157696	https://doi.org/10.17602/M2/M392633
Museum of Comparative Zoology - Mammals	Nasalis larvatus	MCZ Mammals 37328	https://doi.org/10.17602/M2/M383273
Yale Peabody Museum of Natural History - Vertebrate Paleontology	Necrolemur antiquus	YPM VP 18302	https://doi.org/10.17602/M2/M392413
Field Museum of Natural History - Vertebrate Paleontology	Nesodon umbricatus	FMNH P 13076	https://doi.org/10.17602/M2/M406108
Field Museum of Natural History - Vertebrate Paleontology	Notharctus sp (Necrolemur antiquus)	FMNH PM 59264	https://doi.org/10.17602/M2/M447891
Natural History Museum of Los Angeles - La Brea Tar Pits	Nothrotheriops shastensis (Nothrotherium shanstense)	LACMHC 1800-6	https://doi.org/10.17602/M2/M384324
National Museum of Health and Medicine - University of Wisconsin Neuroanatomy Collection	Odocoileus virginianus	NMHM Vertebrates WISC 67-81 1	https://doi.org/10.17602/M2/M454751
National Museum of Health and Medicine - University of Wisconsin Neuroanatomy Collection	Odocoileus virginianus	NMHM Vertebrates WISC 67-81 2	https://doi.org/10.17602/M2/M454757
Yale Peabody Museum of Natural History - Vertebrate Paleontology	Orthocynodon (Amynodon) sp (Hyrachyus modestus)	YPM VPPU 10145	https://doi.org/10.17602/M2/M392350
Field Museum of Natural History - Vertebrate Paleontology	Oxydactylus sp	FMNH P 12117	https://doi.org/10.17602/M2/M406130
Yale Peabody Museum of Natural History - Vertebrate Paleontology	Pachyaena ossifraga	YPM VPPU 14708	https://doi.org/10.17602/M2/M387520
Field Museum of Natural History - Vertebrate Paleontology	Pachylemur (Lemur) insignis	FMNH PM 59253	https://doi.org/10.17602/M2/M406142
Field Museum of Natural History - Vertebrate Paleontology	Palaeopropithecus maximus	FMNH PM 59250	https://doi.org/10.17602/M2/M447878
Field Museum of Natural History - Vertebrate Paleontology	Palaeosyops sp	FMNH PM 59198	https://doi.org/10.17602/M2/M406209
Harry Jerison	Pan troglodytes	L-HJ Vertebrates 0007	https://doi.org/10.17602/M2/M451500
National Museum of Health and Medicine - University of Wisconsin Neuroanatomy Collection	Pan troglodytes	NMHM Vertebrates WISC 63-307	https://doi.org/10.17602/M2/M454765
Natural History Museum of Los Angeles - La Brea Tar Pits	Panthera (Felis) atrox	LACMHC 2900-1	https://doi.org/10.17602/M2/M384329
American Museum of Natural History - Vertebrate Paleontology	Paracynarctus (Phlaocyon) sinclairi	AMNH FM 61009	https://doi.org/10.17602/M2/M396096
Natural History Museum of Los Angeles - La Brea Tar Pits	Paramylodon harlani	LACMHC 1717-33	https://doi.org/10.17602/M2/M384319
American Museum of Natural History - Vertebrate Paleontology	Paratomarctus euthos	AMNH FM 61074	https://doi.org/10.17602/M2/M396102
American Museum of Natural History - Vertebrate Paleontology	Patriomanis americana	AMNH FM 78999	https://doi.org/10.17602/M2/M396108
Maciej Henneberg Lab	Phascolarctos cinereus	L-MH Mammals 0001	https://doi.org/10.17602/M2/M397634
Maciej Henneberg Lab	Phascolarctos cinereus	L-MH Mammals 0002	https://doi.org/10.17602/M2/M397629
American Museum of Natural History - Vertebrate Paleontology	Phenacodus primaevus	AMNH FM 4369	https://doi.org/10.17602/M2/M396114
American Museum of Natural History - Mammals	Pithecia (Cercopithecus) monachus	AMNH Mammals 75981	https://doi.org/10.17602/M2/M387802
Harry Jerison	Plagiolophus minor	L-HJ Vertebrates 0003	https://doi.org/10.17602/M2/M397590
Carnegie Museum of Natural History - Vertebrate Paleontology	Platygonus compressus	CM VP 12888	https://doi.org/10.17602/M2/M411026
Field Museum of Natural History - Vertebrate Paleontology	Plesiogale paragale (Paragale huerzeleri)	NMB M.A.4641	https://doi.org/10.17602/M2/M406215
Field Museum of Natural History - Vertebrate Paleontology	Pliohippus sp	FMNH P 15870	https://doi.org/10.17602/M2/M407929
American Museum of Natural History - Vertebrate Paleontology	Plionictis parviloba	AMNH FM 25314	https://doi.org/10.17602/M2/M396120
American Museum of Natural History - Vertebrate Paleontology	Poebrotherium	AMNH F:AM 31700	https://doi.org/10.17602/M2/M396491
Natural History Museum, London - Vertebrate Paleontology	Potamotherium valentoni	NHMUK PV M 29357	https://doi.org/10.17602/M2/M410956
American Museum of Natural History - Mammals	Presbytis (Semnopithecus) johnii	AMNH Mammals 54644	https://doi.org/10.17602/M2/M387813
American Museum of Natural History - Vertebrate Paleontology	Procamelus grandis	AMNH FM 40425	https://doi.org/10.17602/M2/M396499
American Museum of Natural History - Vertebrate Paleontology	Procynodictis angustidens	AMNH FM 95590	https://doi.org/10.17602/M2/M396507
Field Museum of Natural History - Mammals	Procyon lotor	FMNH Mammals 146352	https://doi.org/10.17602/M2/M397656
Field Museum of Natural History - Vertebrate Paleontology	Promartes olcotti	FMNH P 25233	https://doi.org/10.17602/M2/M407940
Field Museum of Natural History - Vertebrate Paleontology	Promerycochoerus superbus	FMNH PM 59072	https://doi.org/10.17602/M2/M407946
American Museum of Natural History - Vertebrate Paleontology	Proterotherium cavum	AMNH FM 9245	https://doi.org/10.17602/M2/M396514
Field Museum of Natural History - Vertebrate Paleontology	Protypotherium	FMNH P 13046	https://doi.org/10.17602/M2/M407952
American Museum of Natural History - Vertebrate Paleontology	Pseudaelurus validus	AMNH FM 61835	https://doi.org/10.17602/M2/M396520
American Museum of Natural History - Vertebrate Paleontology	Pseudhipparion gratum	AMNH FM 70025	https://doi.org/10.17602/M2/M396526
American Museum of Natural History - Vertebrate Paleontology	Pseudotypotherium pseudopachygnathum	AMNH FM 14509	https://doi.org/10.17602/M2/M396556
Natural History Museum, London - Vertebrate Paleontology	Pterodon dasyuroides	NHMUK PV M 25985 b	https://doi.org/10.17602/M2/M387747
American Museum of Natural History - Mammals	Pygathrix nigripes	AMNH Mammals 69555	https://doi.org/10.17602/M2/M387823
Museum of Comparative Zoology - Mammals	Rhinopithecus avunculas	MCZ Mammals 13681	https://doi.org/10.17602/M2/M387558
Field Museum of Natural History - Vertebrate Paleontology	Rhynchippus equinus	FMNH P 13140	https://doi.org/10.17602/M2/M407994
American Museum of Natural History - Mammals	Simias concolor	AMNH Mammals 103359	https://doi.org/10.17602/M2/M387833
Yale Peabody Museum of Natural History - Vertebrate Paleontology	Smilodectes gracilis	YPM VP 12152	https://doi.org/10.17602/M2/M392386
Natural History Museum of Los Angeles - La Brea Tar Pits	Smilodon fatalis	LACMHC 2001-199	https://doi.org/10.17602/M2/M384334
Field Museum of Natural History - Vertebrate Paleontology	Sthenurus cf. orientalis	FMNH PM 59245	https://doi.org/10.17602/M2/M411179
Field Museum of Natural History - Mammals	Theropithecus gelada	FMNH Mammals 8174	https://doi.org/10.17602/M2/M382813
South Australian Museum - Palaeontology	Thylacoleo carniflex	SAMA P18681	https://doi.org/10.17602/M2/M392331
Yale Peabody Museum of Natural History - Vertebrate Paleontology	Tillyhorse (Mammalia indet.)	YPM VP 11694	https://doi.org/10.17602/M2/M382605
Field Museum of Natural History - Vertebrate Paleontology	Titanoides primaevus	FMNH PM 8655	https://doi.org/10.17602/M2/M408000
Field Museum of Natural History - Vertebrate Paleontology	Typotheriopsis internum	FMNH P 14420	https://doi.org/10.17602/M2/M408006
Yale Peabody Museum of Natural History - Vertebrate Paleontology	Uintatherium anceps	YPM VP 11036	https://doi.org/10.17602/M2/M382600
University of California Museum of Paleontology - Vertebrate Paleontology	Urocyon cinereoargenteus (Urocyon californicus)	UCMP V 12263	https://doi.org/10.17602/M2/M392621
Harry Jerison	Ursus arctos	L-HJ Vertebrates 0008	https://doi.org/10.17602/M2/M384298
American Museum of Natural History - Vertebrate Paleontology	Ustatochoerus profectus	AMNH FM 33617	https://doi.org/10.17602/M2/M396566
Museums Victoria - Mammals	Vombatus ursinus	NMV C7780	https://doi.org/10.17602/M2/M392610
Field Museum of Natural History - Vertebrate Paleontology	Zodiolestes daimonelixensis	FMNH P 12032	https://doi.org/10.17602/M2/M408012
